# Supplementary material
Source: PubMed Central journal article supplement (PMC3437576)
Supplement: mt201283x1.pdf [file mt201283x1.pdf]

## Supplemental Figure 1

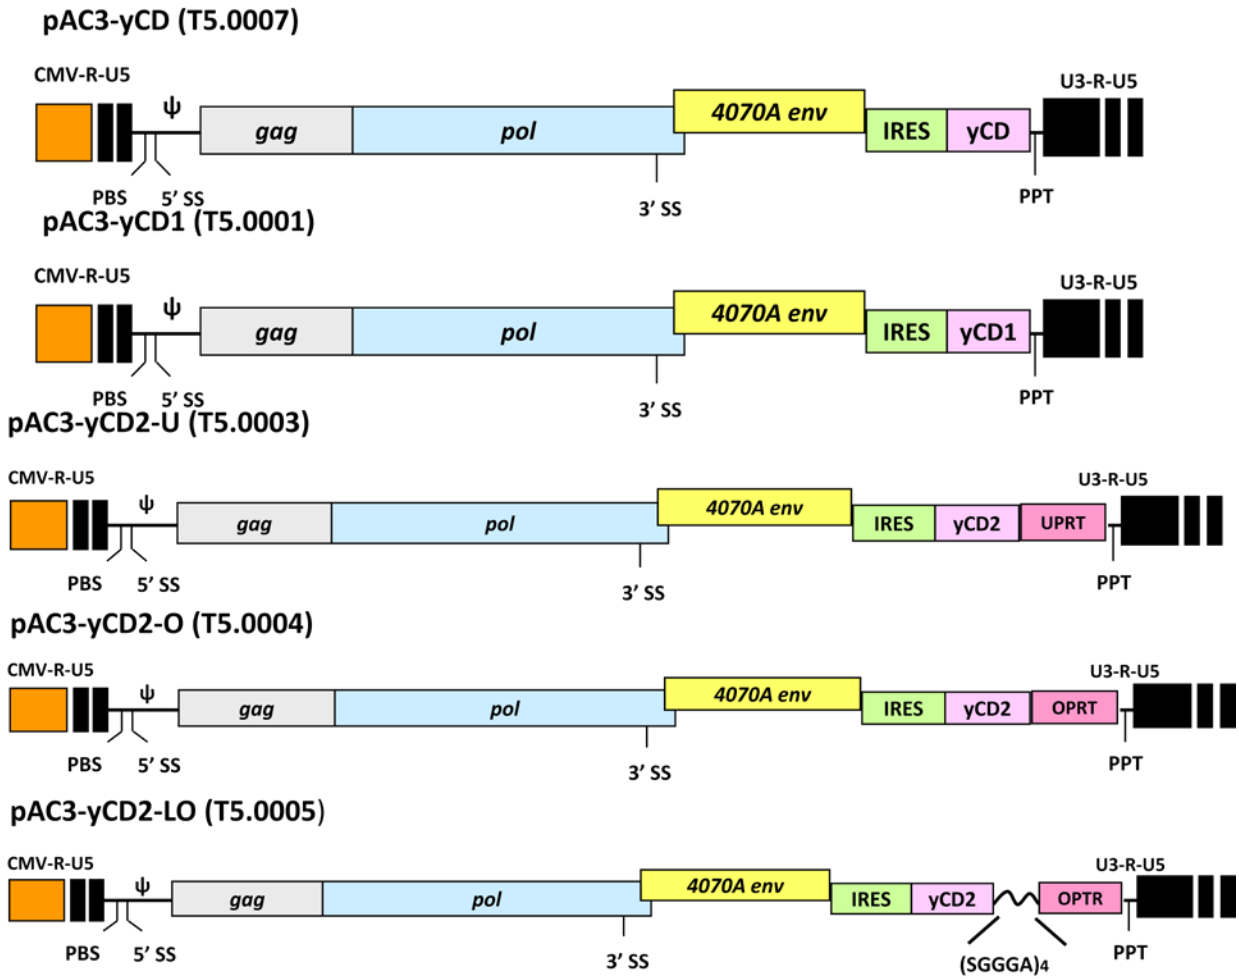

**Supplemental Figure 1. Configuration of plasmid constructs encoding RRV's constructed from Moloney MLV with an amphotropic envelope and various CD and Hybrid CD genes. Names of the vectors are as shown and correspond to vectors in Table 1 in the main text.**
